# Supplementary material for: Atomic force acoustic microscopy reveals the influence of substrate stiffness and topography on cell behavior
Source: publisher site journal article supplement (doi:10.3762/bjnano.10.223), 2019-11-26
Supplement: Additional file 1 [file 2190-4286-10-223-S1.pdf]

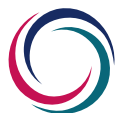

## Supporting Information

for

### **Atomic force acoustic microscopy reveals the influence of substrate stiffness and topography on cell behavior**

Yan Liu, Li Li, Xing Chen, Ying Wang, Meng-Nan Liu, Jin Yan, Liang Cao, Lu Wang and Zuo-Bin Wang

*Beilstein J. Nanotechnol.* **2019**, *10*, 2329–2337. doi:10.3762/bjnano.10.223

## Additional experimental data

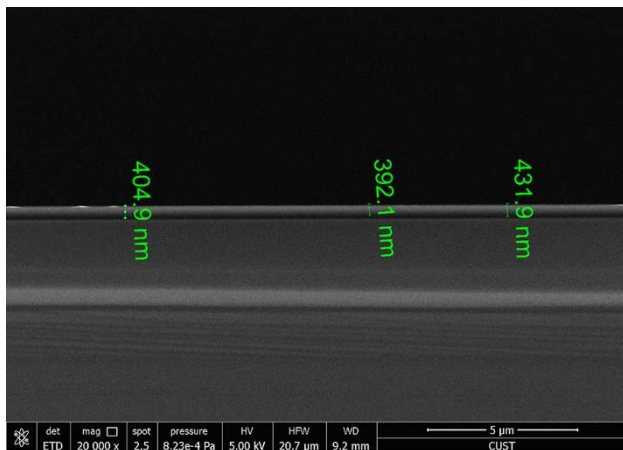

**Figure S1:** Coating thickness measurements of SU-8 by SEM.

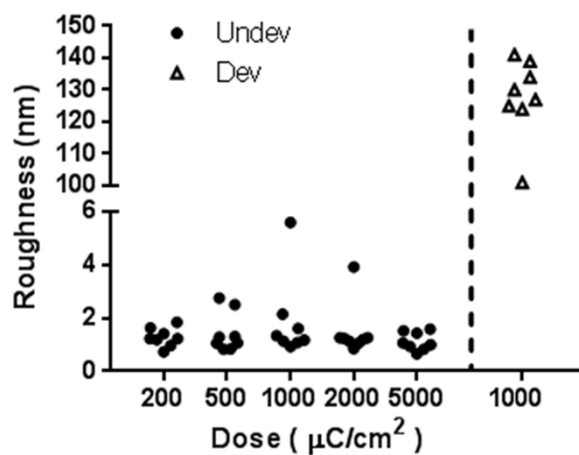

**Figure S2:** Surface roughness measurements of the undeveloped and the developed SU-8 film by AFAM.
